# Supplementary material
Source: ML conference proceedings conference paper supplement (https://openreview.net/forum?id=CAMU0mOR7p)

Heatmap of Mean Grid Consumption at episode end

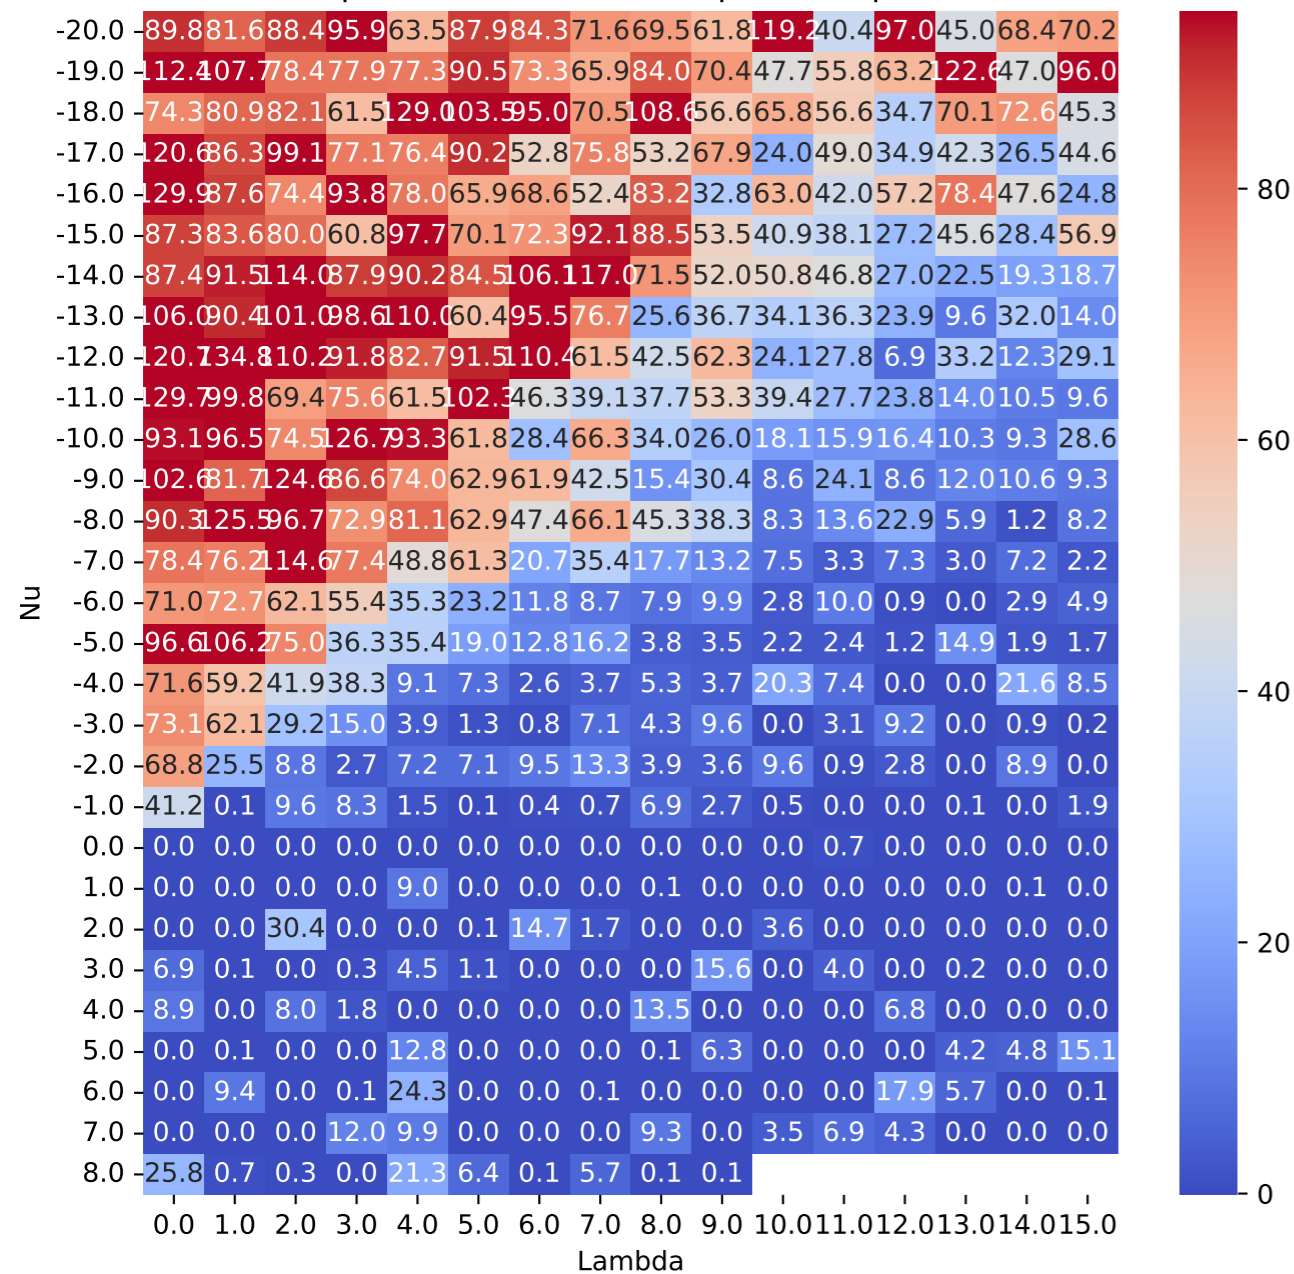

Heatmap of absolute Mean Postponed Demand derivative at episode end

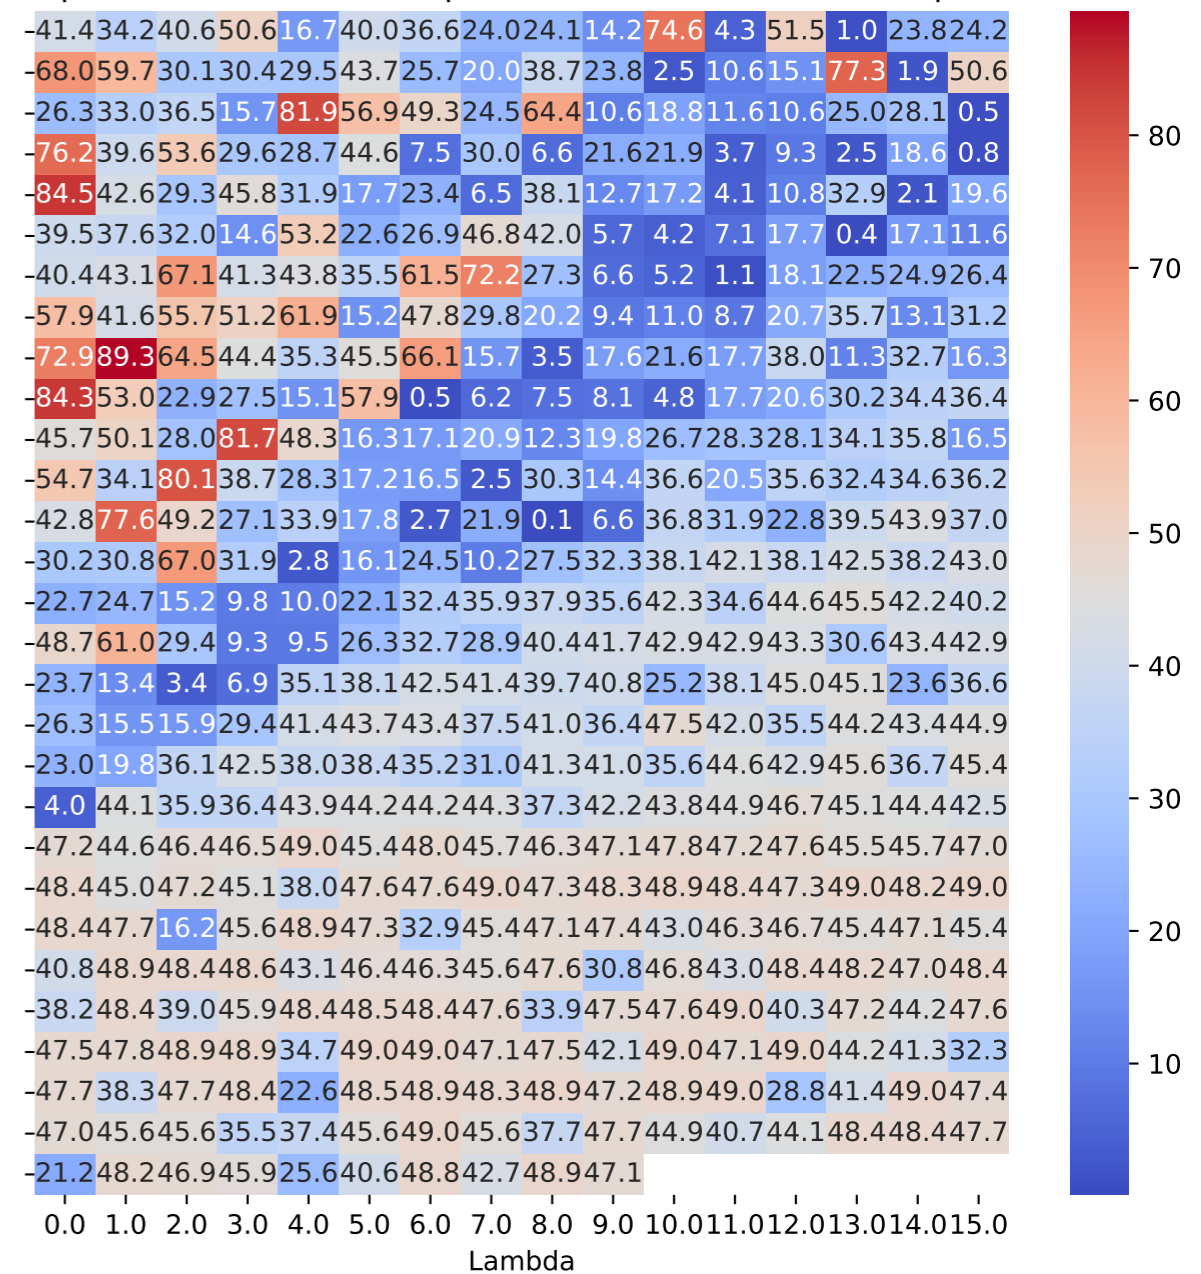

Supplement: supplementary_material [file IPPO_heatmap.pdf › iclear_code_base/cmarl_algorithm/IPPO_heatmap.pdf]
