# Supplementary material
Source: ML conference proceedings conference paper supplement (https://openreview.net/forum?id=CAMU0mOR7p)

Heatmap of absolute Mean Postponed Demand derivative at episode end

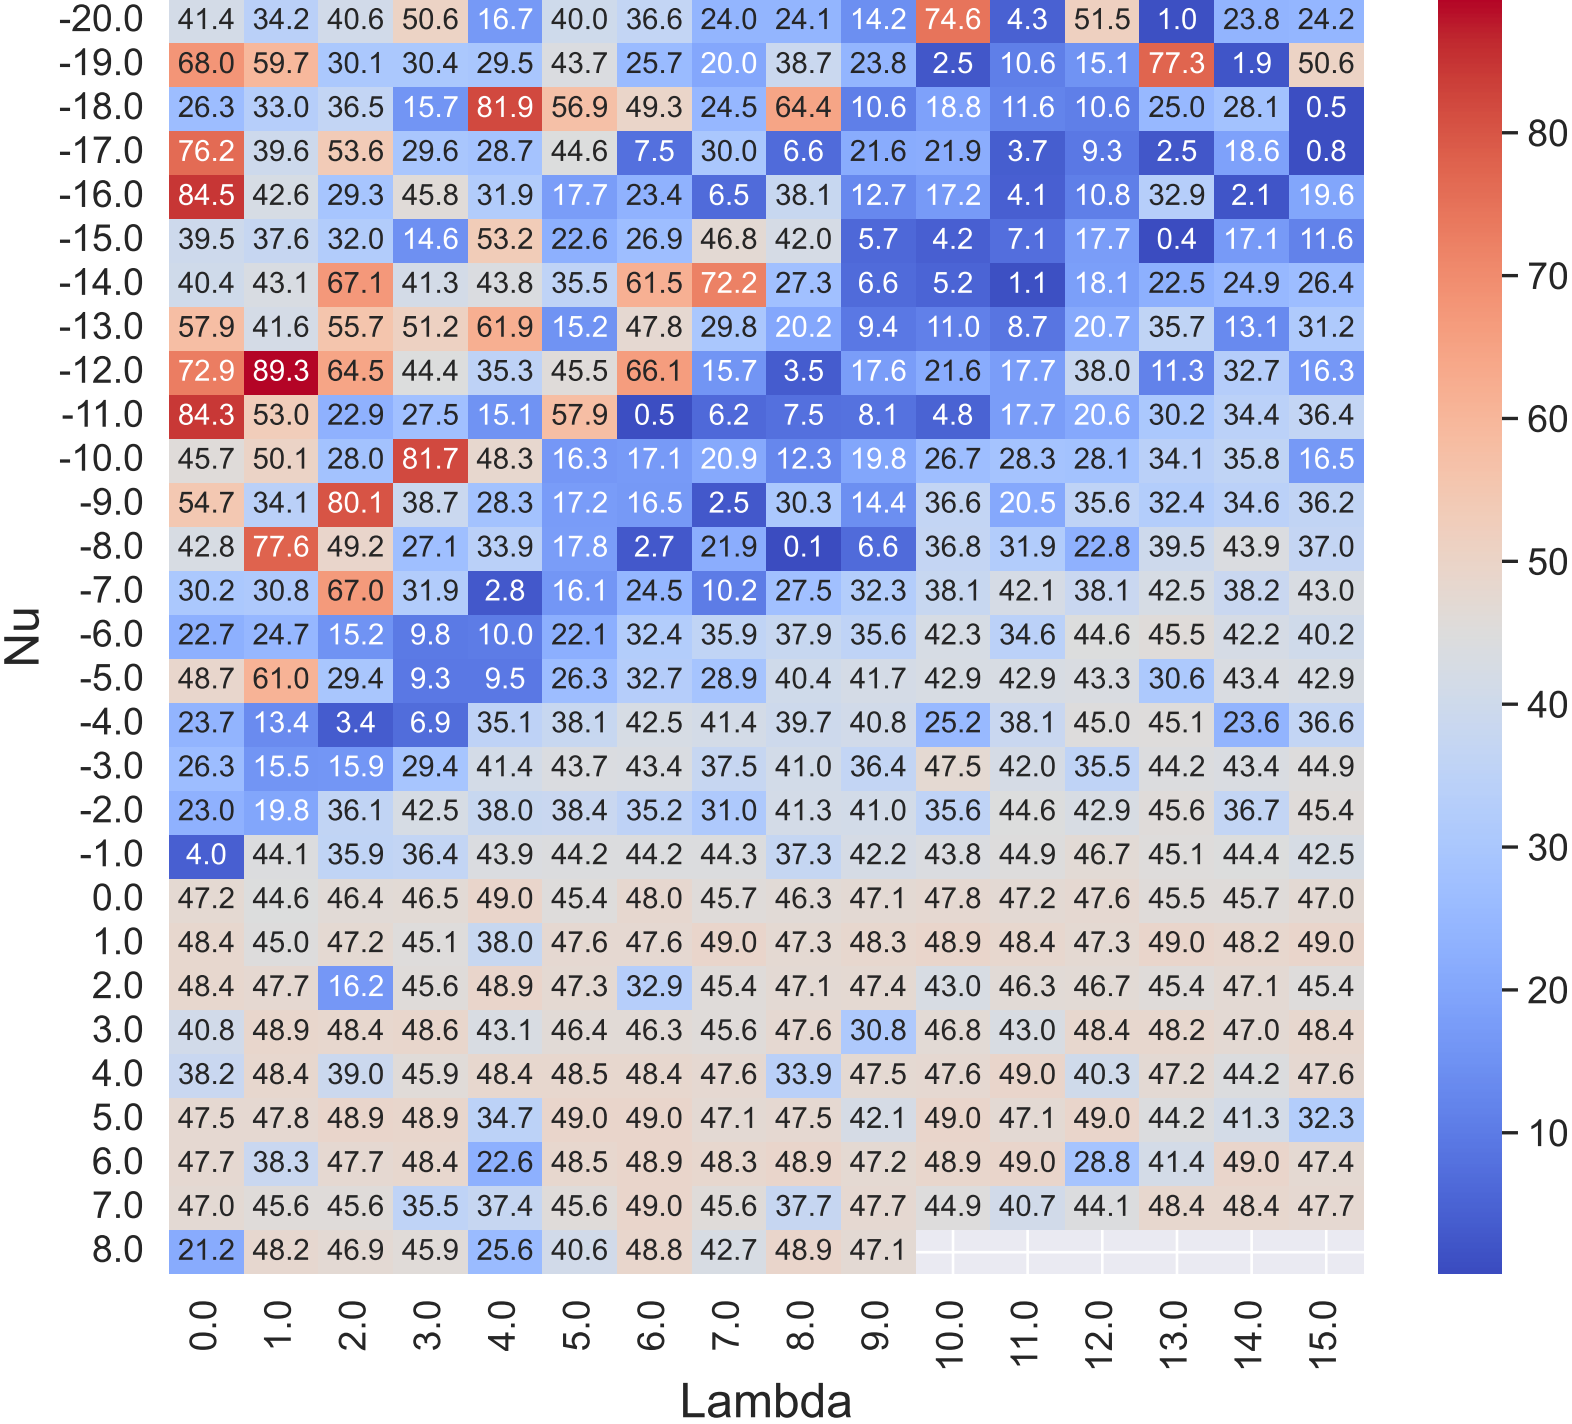

Supplement: supplementary_material [file IPPO_abs_pos_der_heatmap.pdf › iclear_code_base/cmarl_algorithm/IPPO_abs_pos_der_heatmap.pdf]

Heatmap of Mean Grid Consumption at episode end

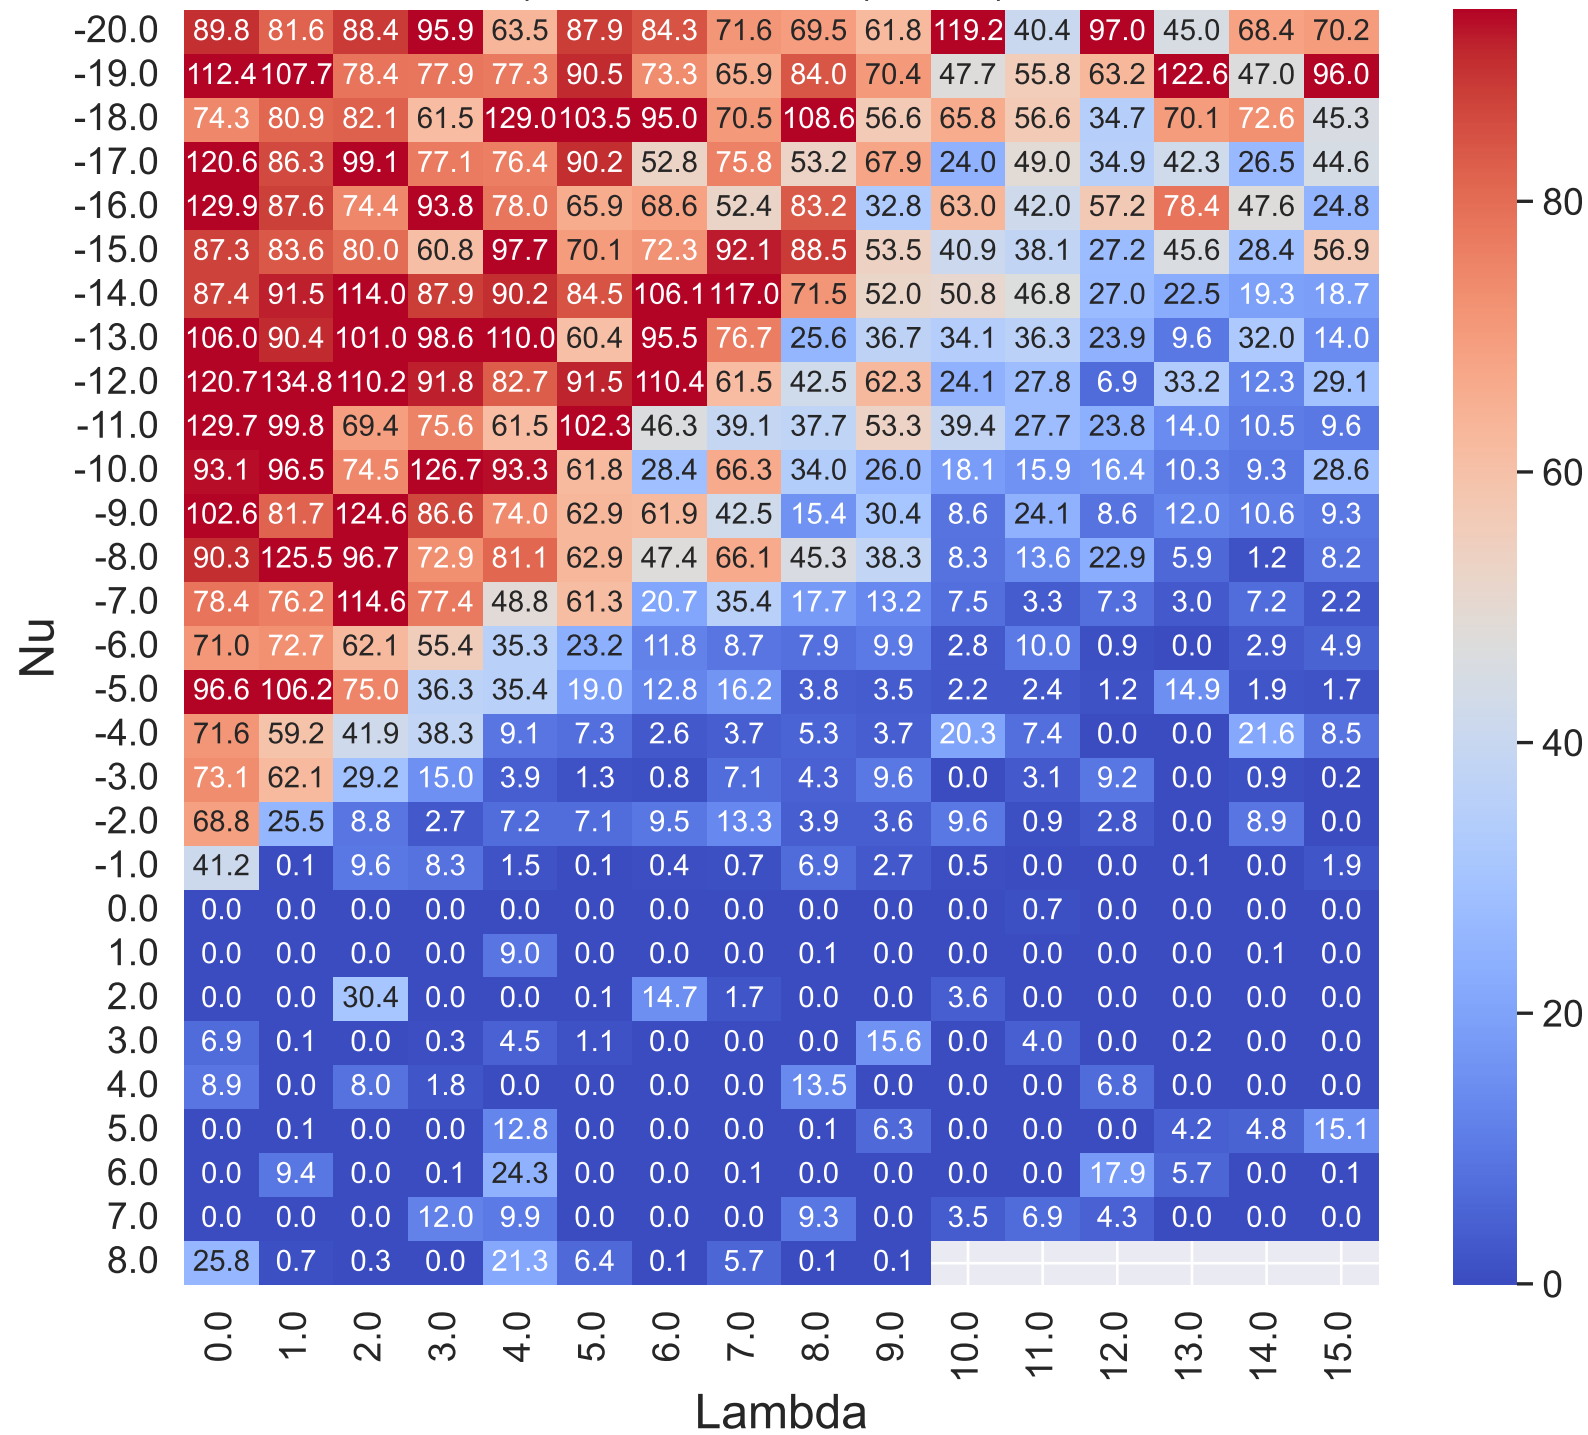

Supplement: supplementary_material [file IPPO_mean_grid_heatmap.pdf › iclear_code_base/cmarl_algorithm/IPPO_mean_grid_heatmap.pdf]

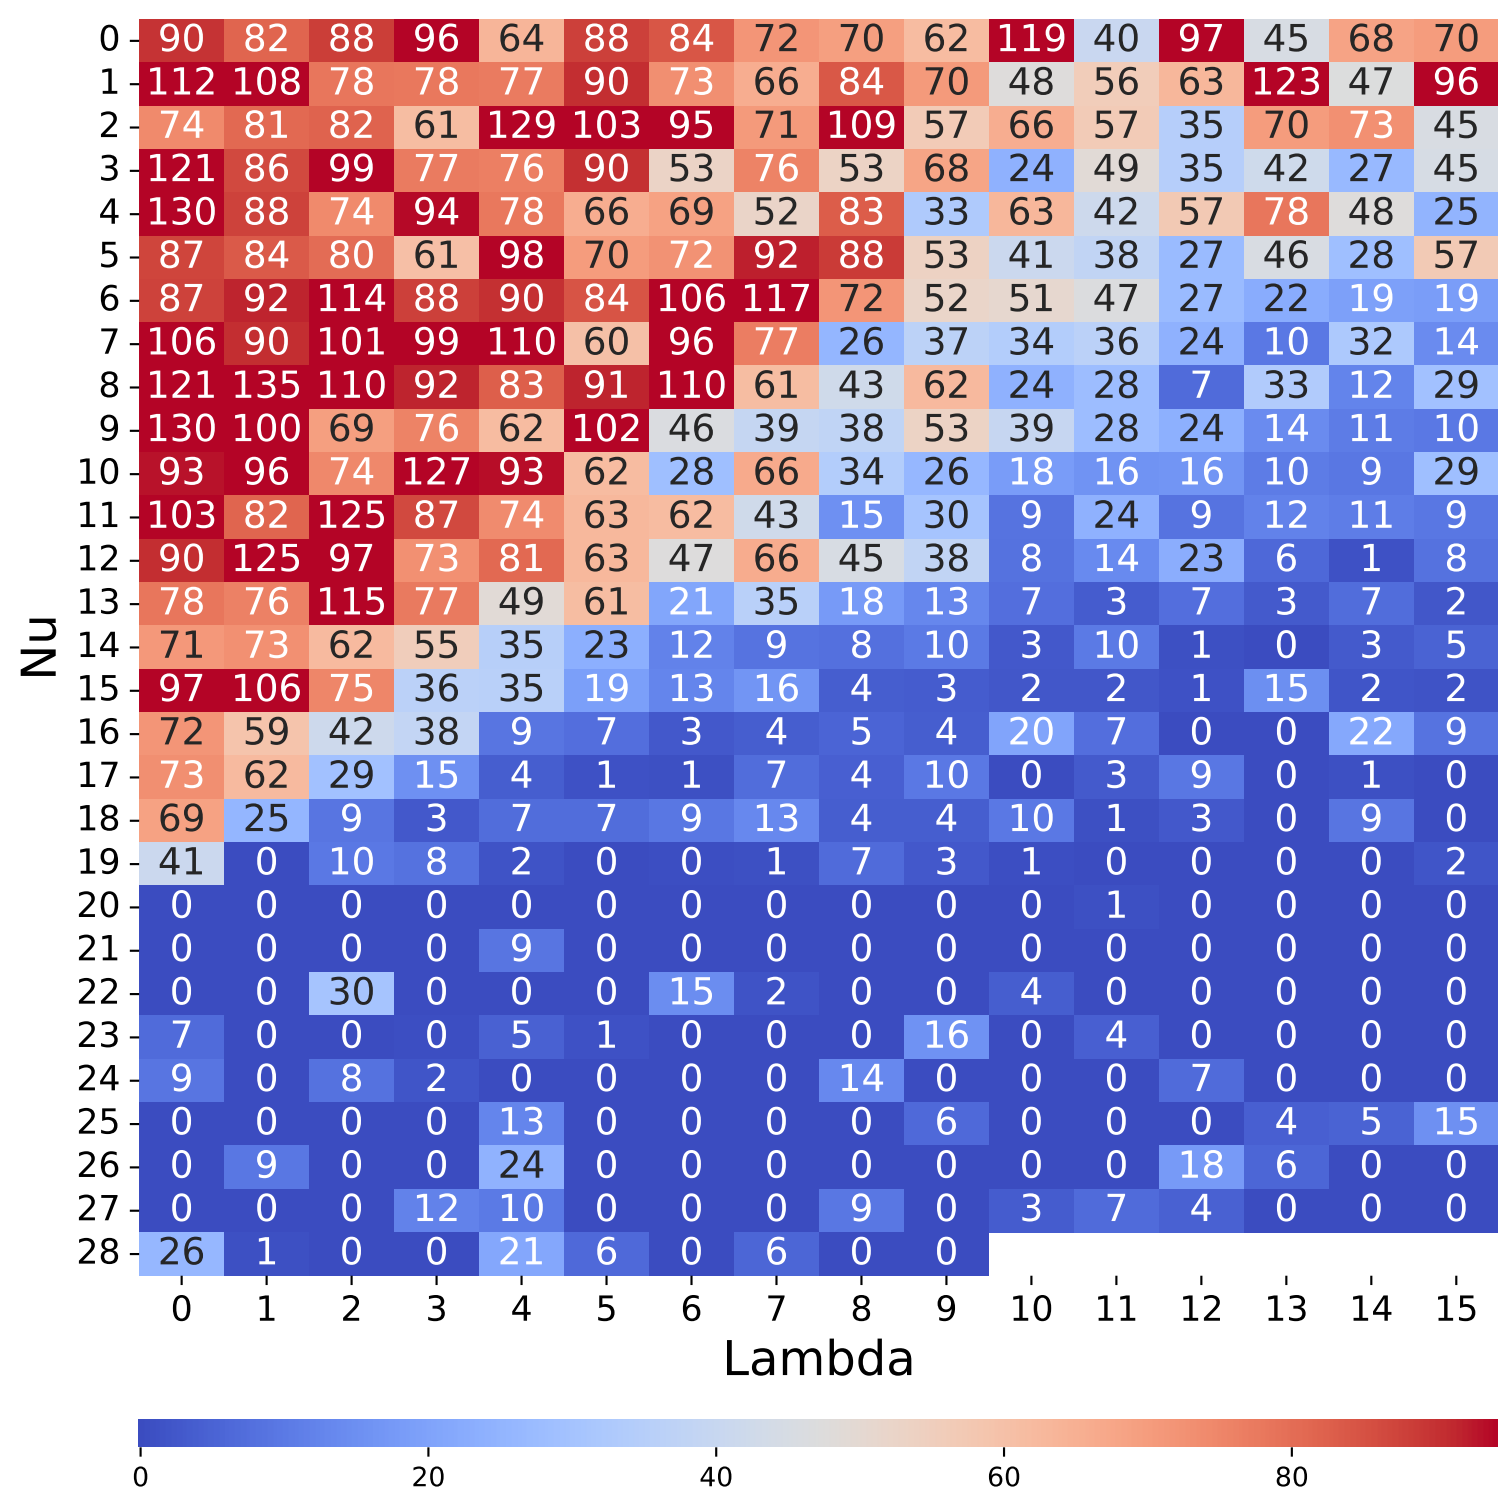

Supplement: supplementary_material [file IPPO_heatmap_grid.pdf › iclear_code_base/cmarl_algorithm/results/IPPO_heatmap_grid.pdf]

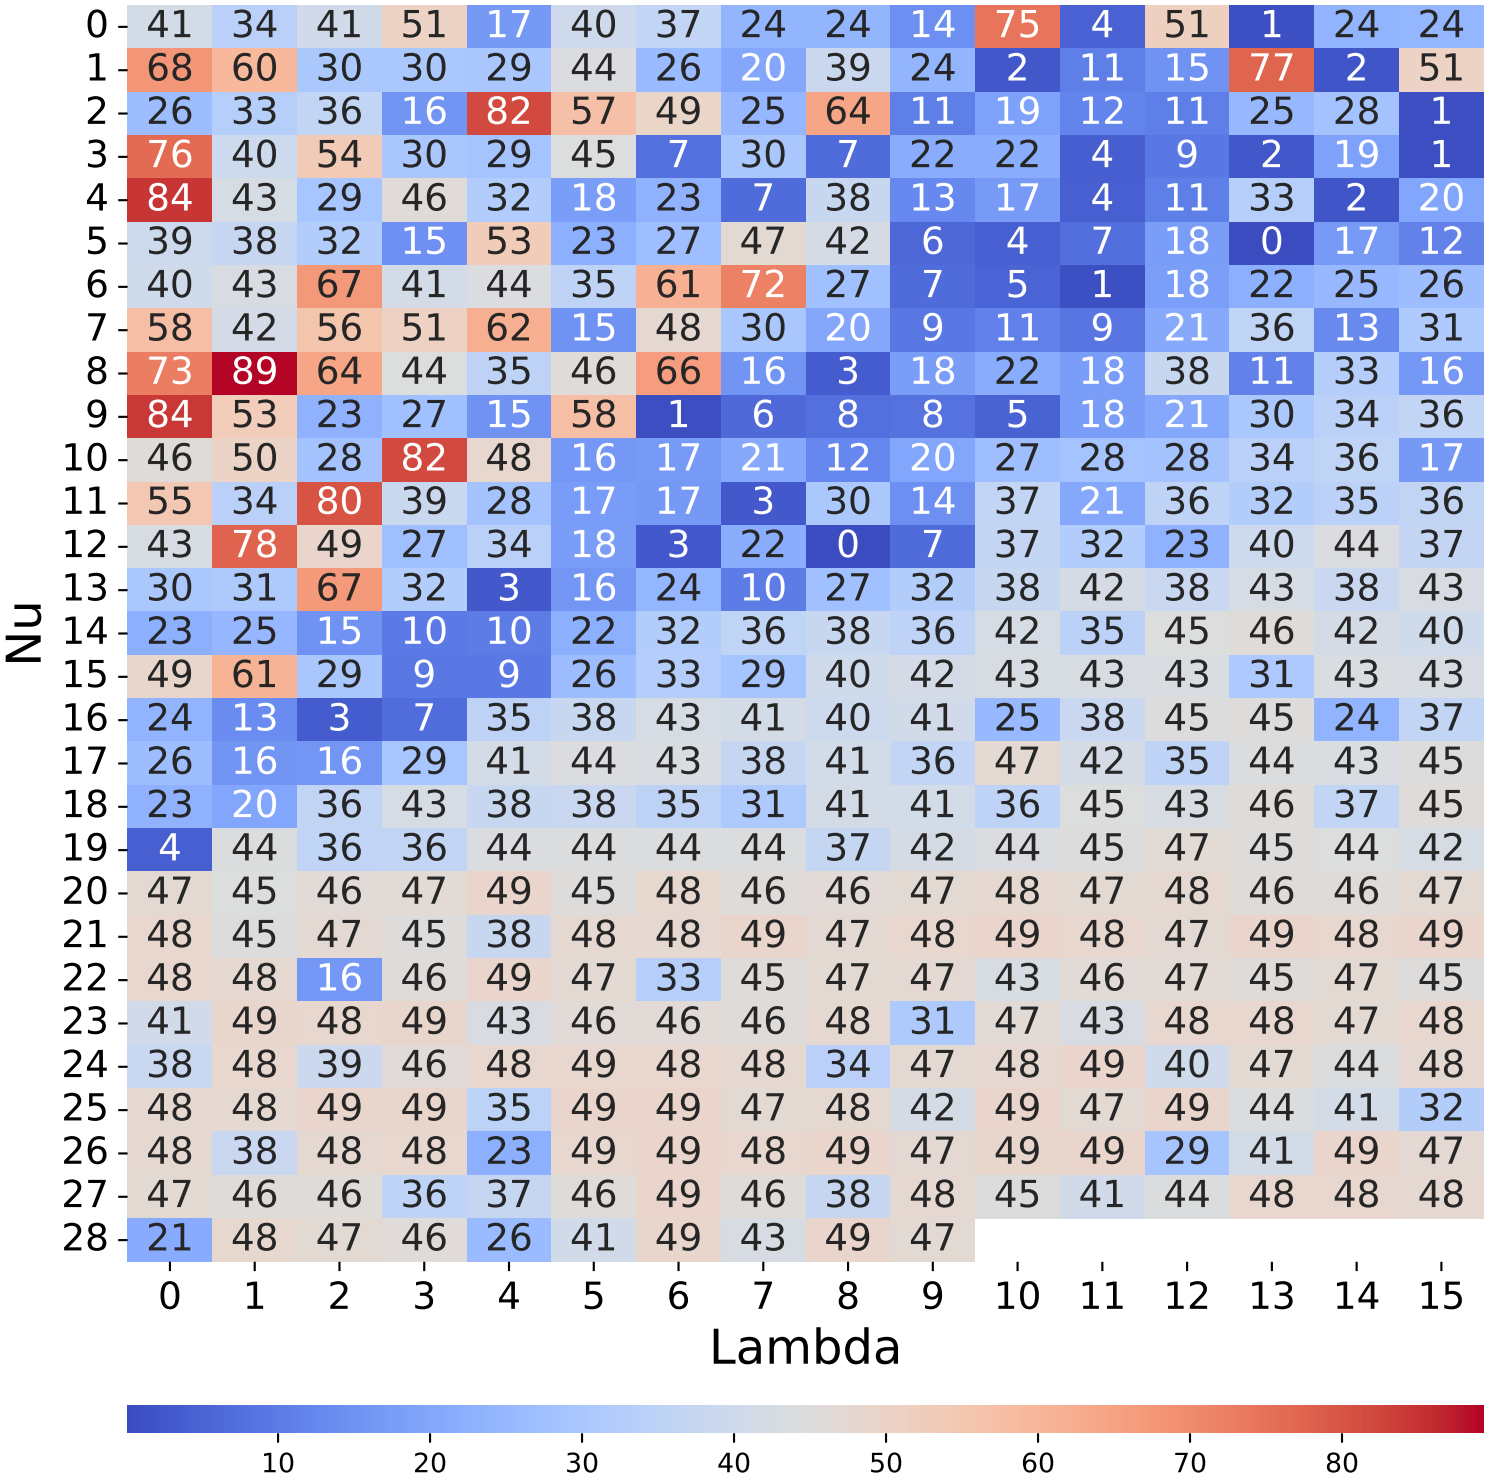

Supplement: supplementary_material [file IPPO_heatmap_pos.pdf › iclear_code_base/cmarl_algorithm/results/IPPO_heatmap_pos.pdf]

# Cost Comparison

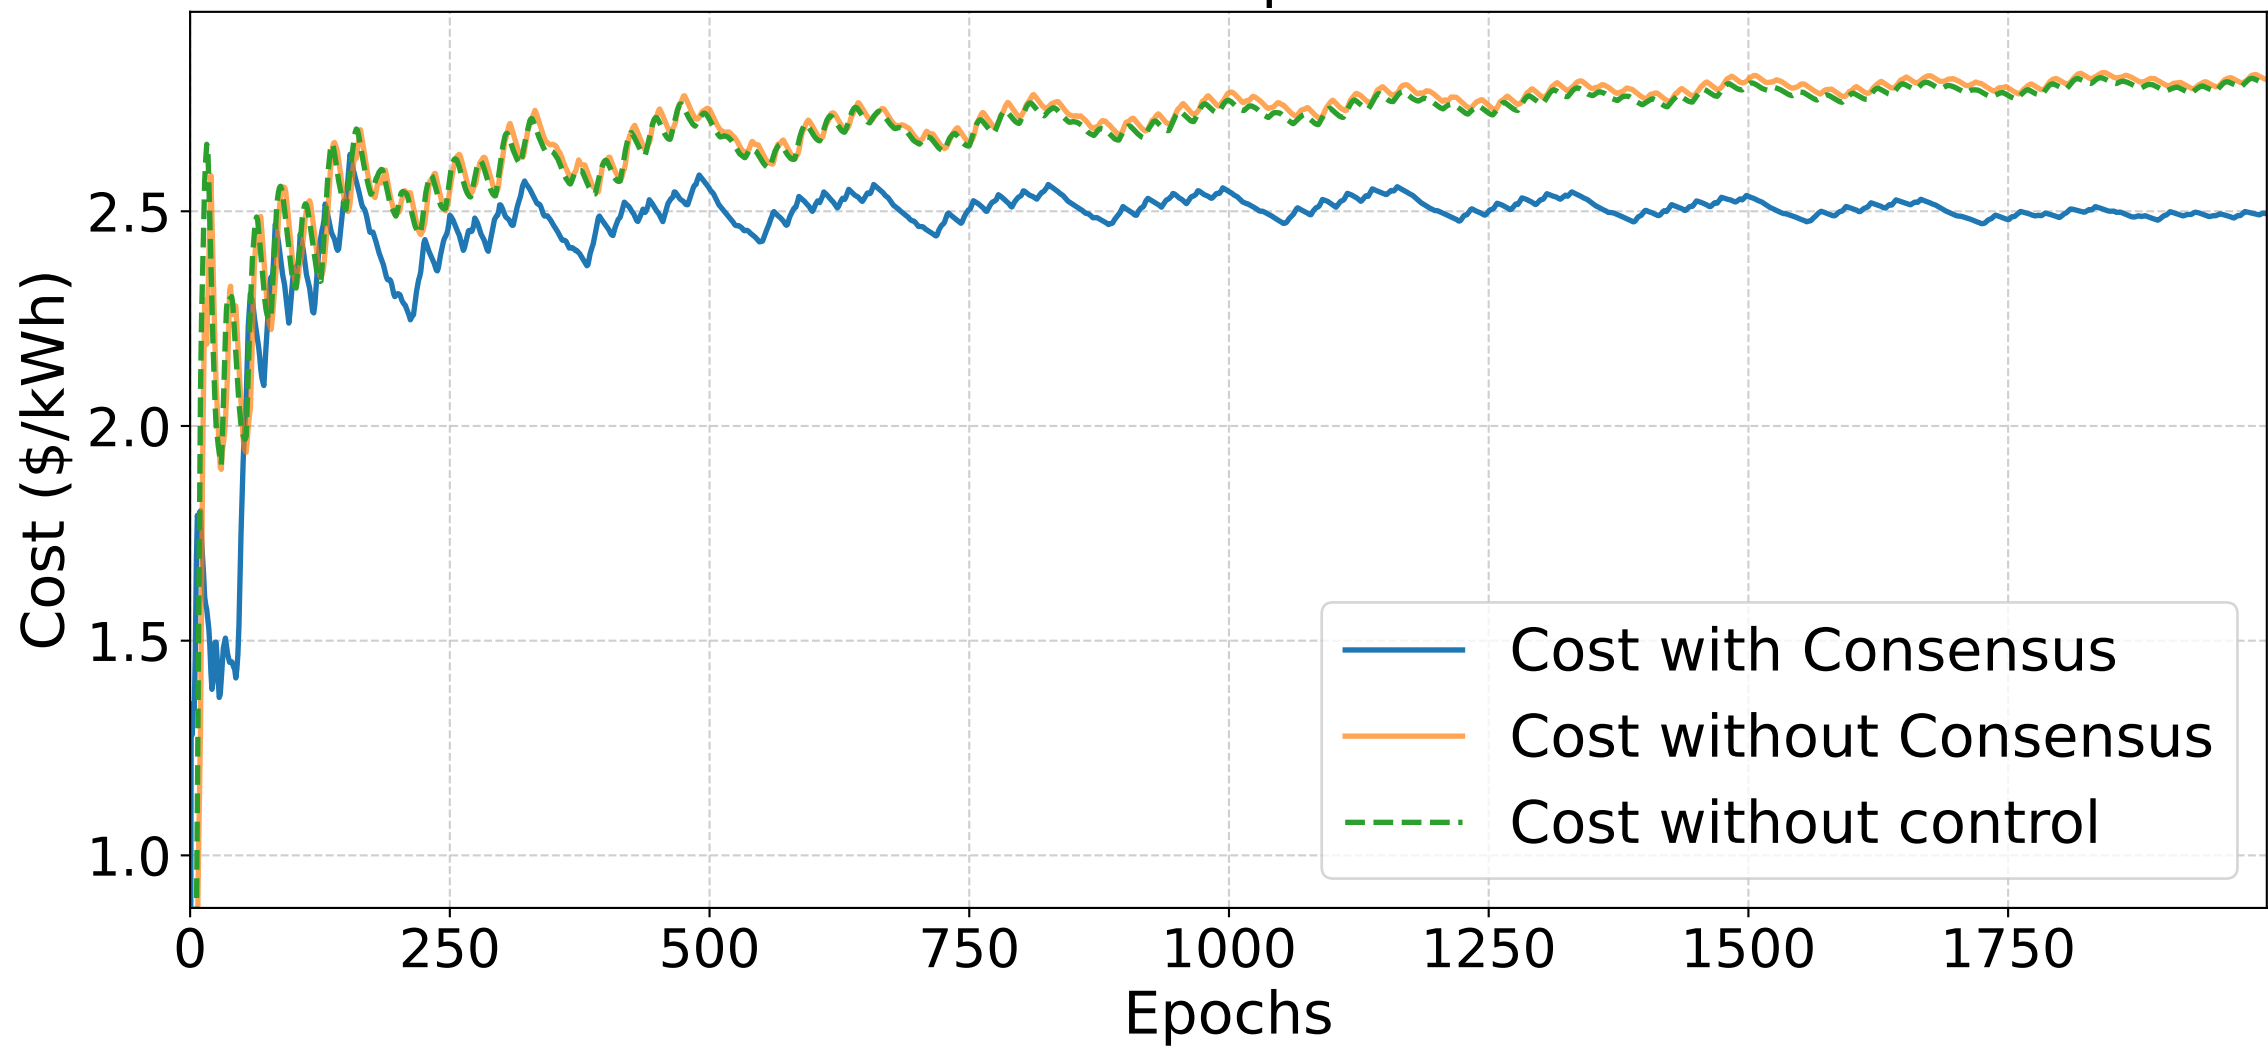

Supplement: supplementary_material [file costComp.pdf › iclear_code_base/cmarl_algorithm/results/costComp.pdf]

# Grid Consumption Comparison

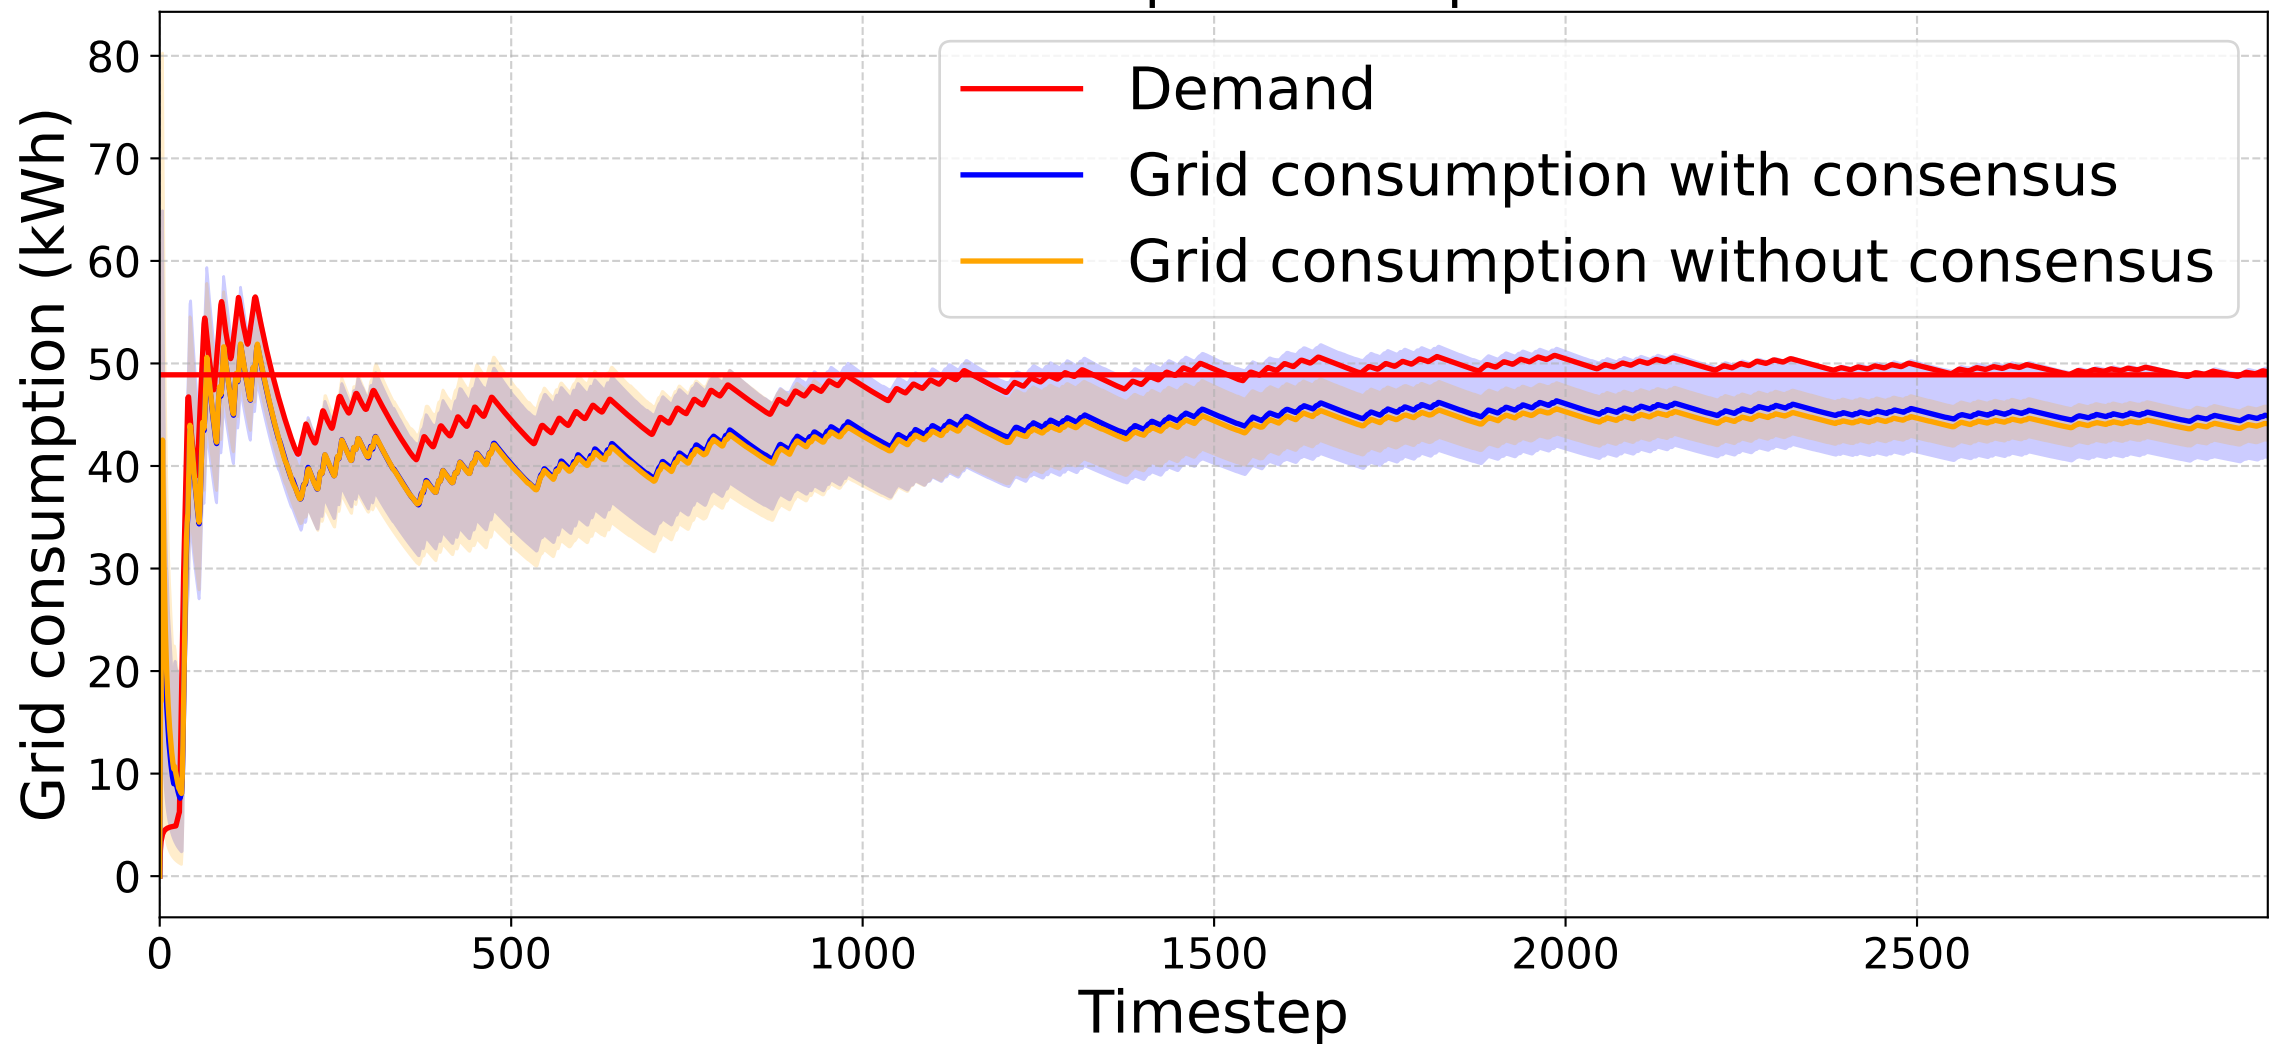

Supplement: supplementary_material [file gridConsComp.pdf › iclear_code_base/cmarl_algorithm/results/gridConsComp.pdf]

# Mean Lambda Across Agents (Running Average)

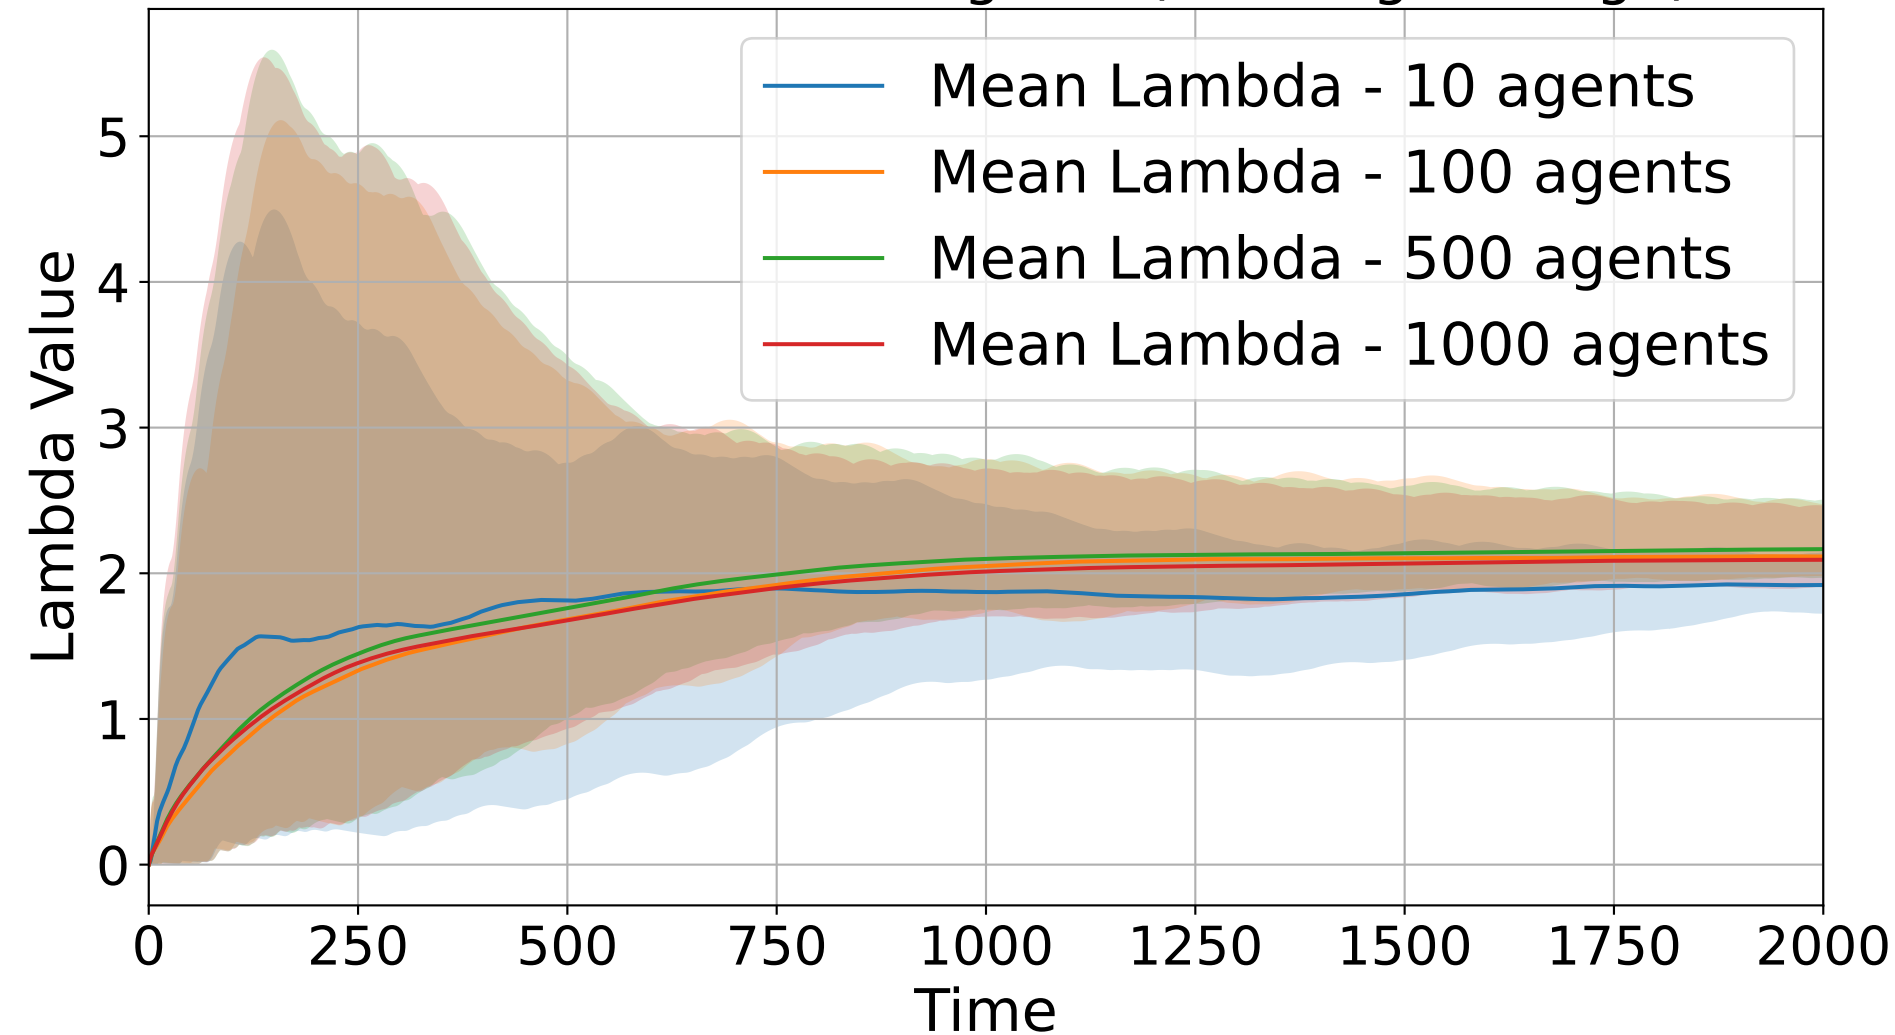

Supplement: supplementary_material [file lambda_conv_increa_ag.pdf › iclear_code_base/cmarl_algorithm/results/lambda_conv_increa_ag.pdf]

Multiplier Value

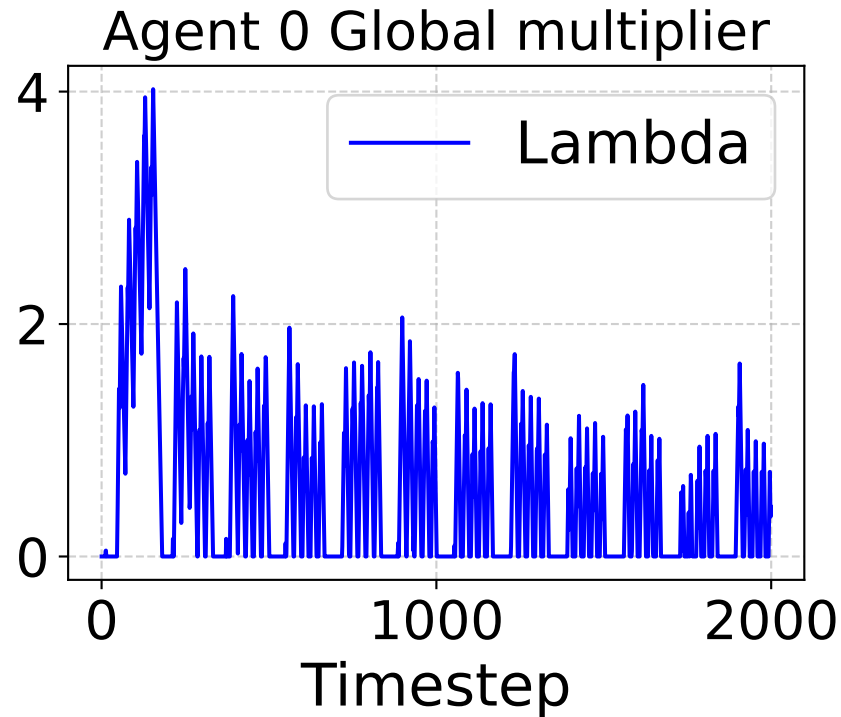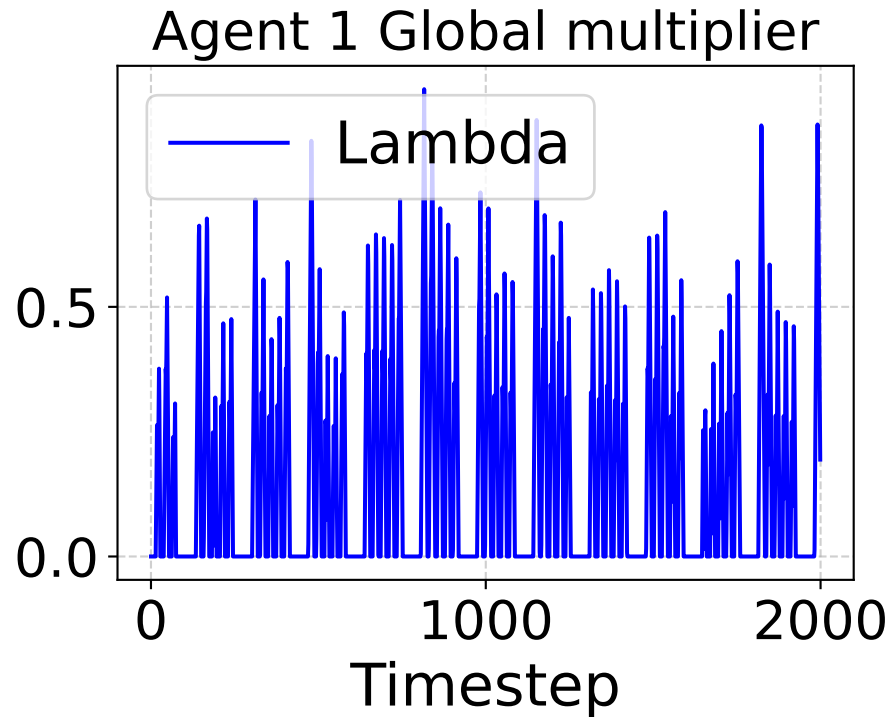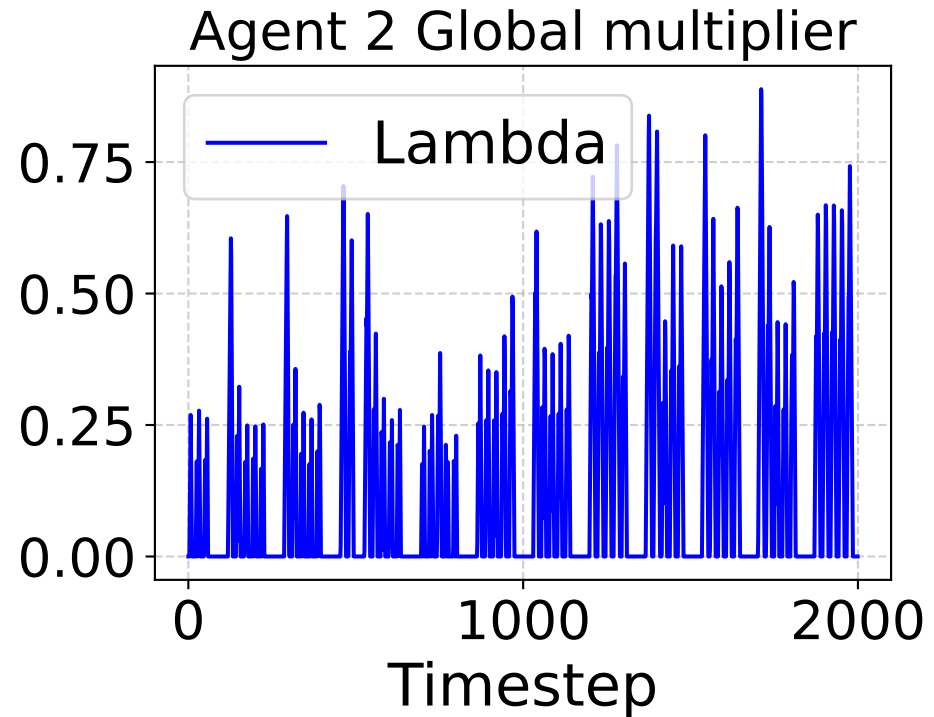

Supplement: supplementary_material [file lambdascons.pdf › iclear_code_base/cmarl_algorithm/results/lambdascons.pdf]

Agent 0 Global multiplier

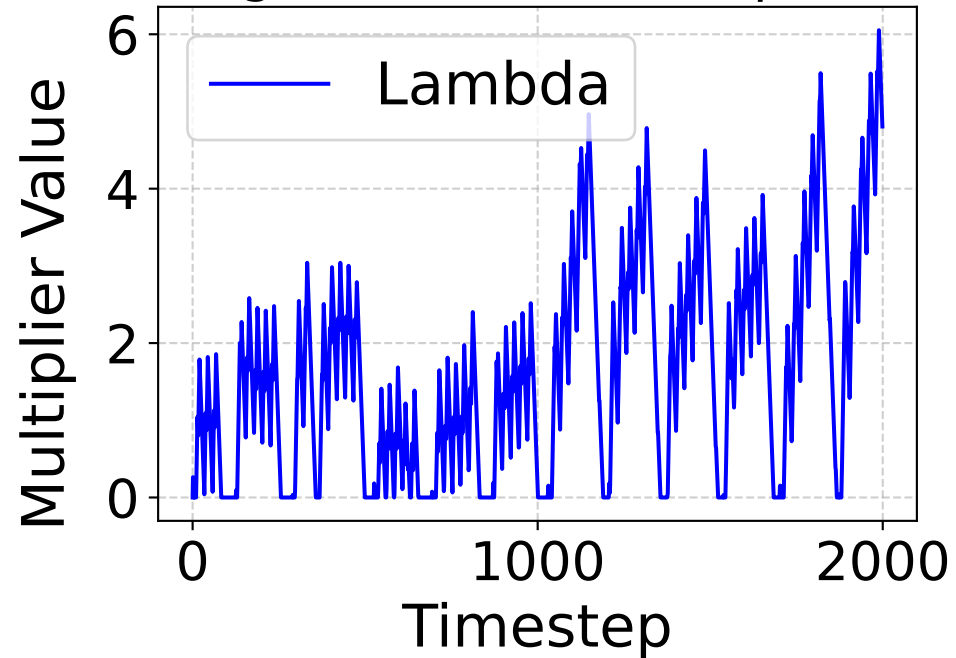

Agent 1 Global multiplier

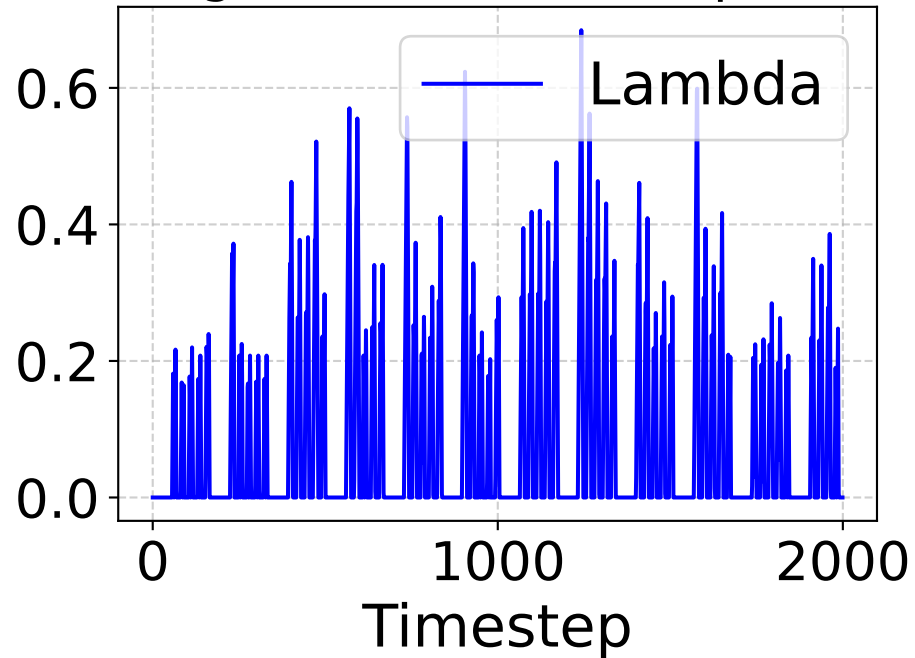

Agent 2 Global multiplier

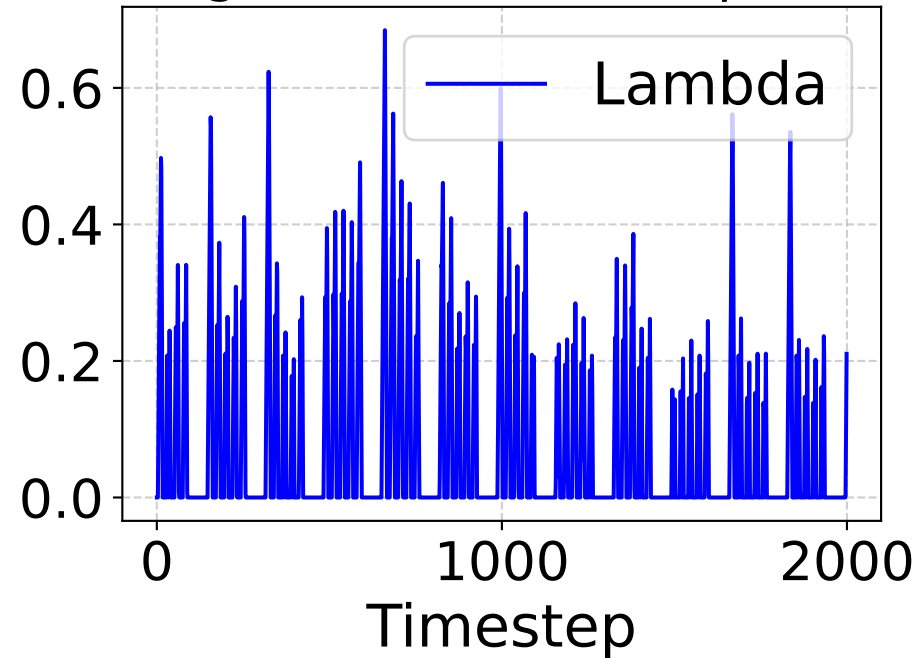

Supplement: supplementary_material [file lambdasnoCons.pdf › iclear_code_base/cmarl_algorithm/results/lambdasnoCons.pdf]

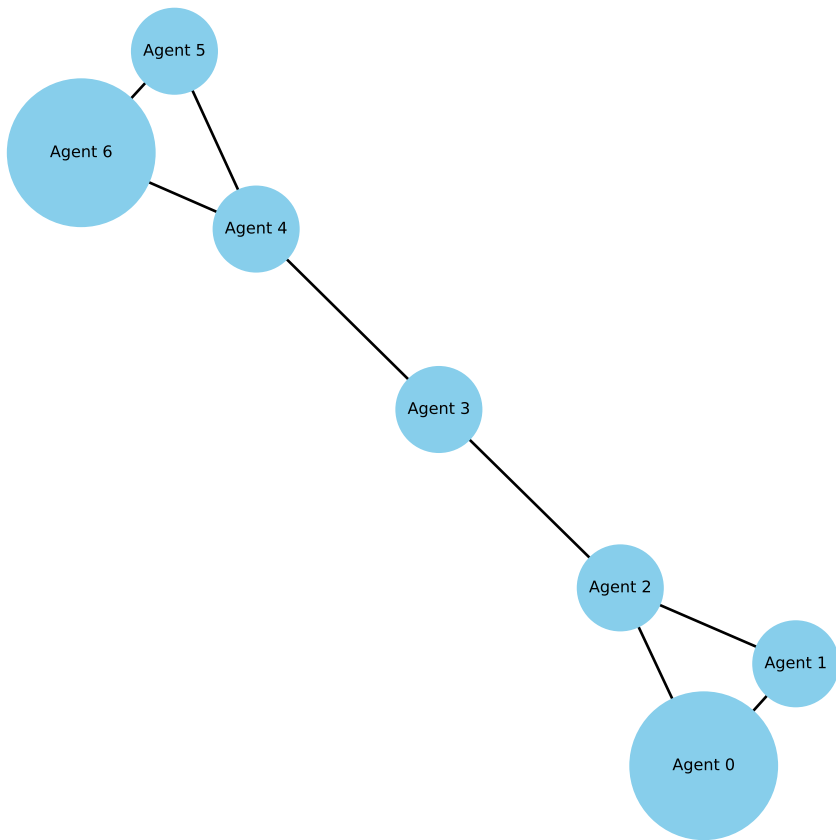

Supplement: supplementary_material [file netConf_A7_E8.pdf › iclear_code_base/cmarl_algorithm/results/netConf_A7_E8.pdf]

# Algorithm Scalability

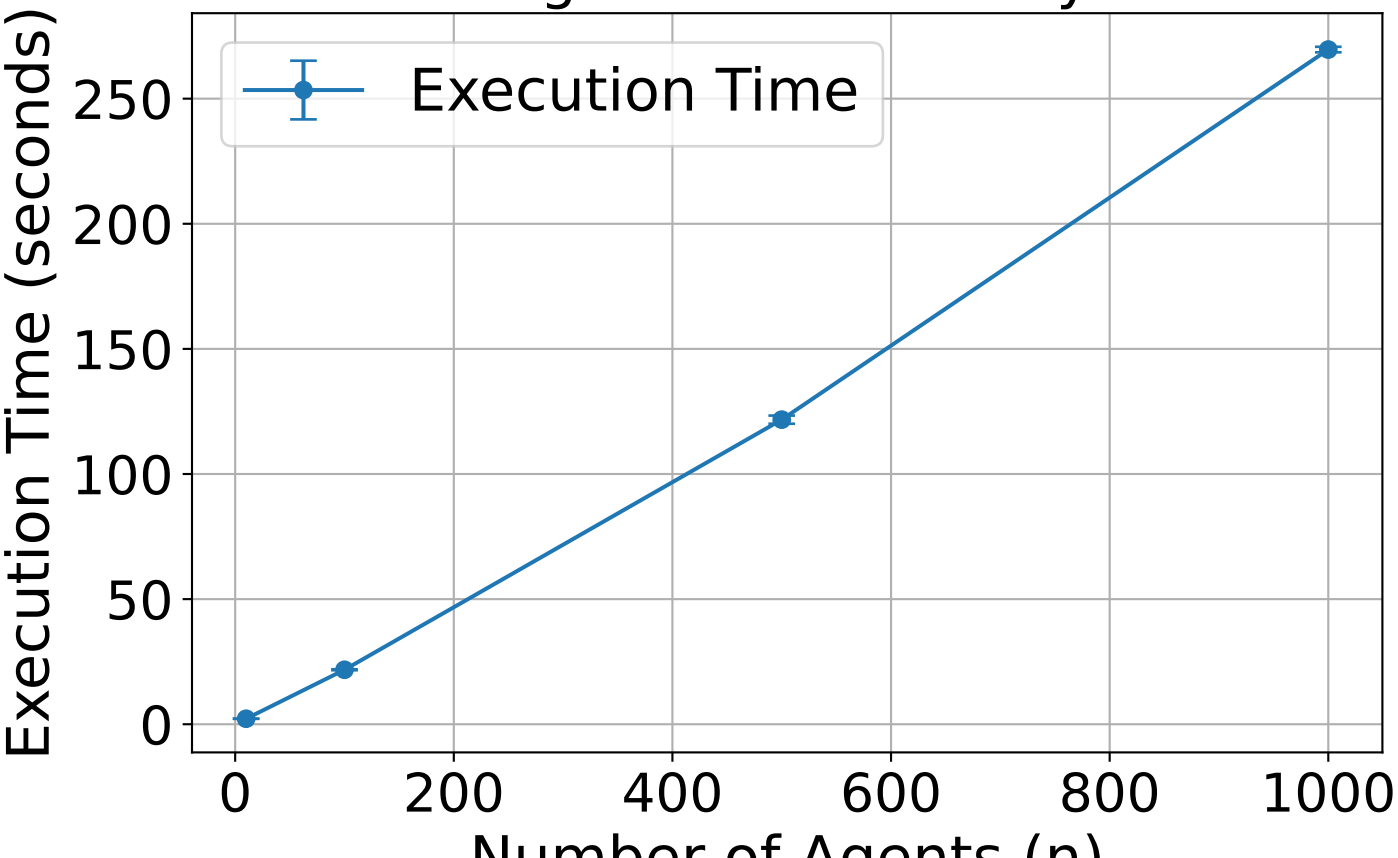

Supplement: supplementary_material [file time_complexity_results.pdf › iclear_code_base/cmarl_algorithm/results/time_complexity_results.pdf]

# Unmet Demand with Consensus

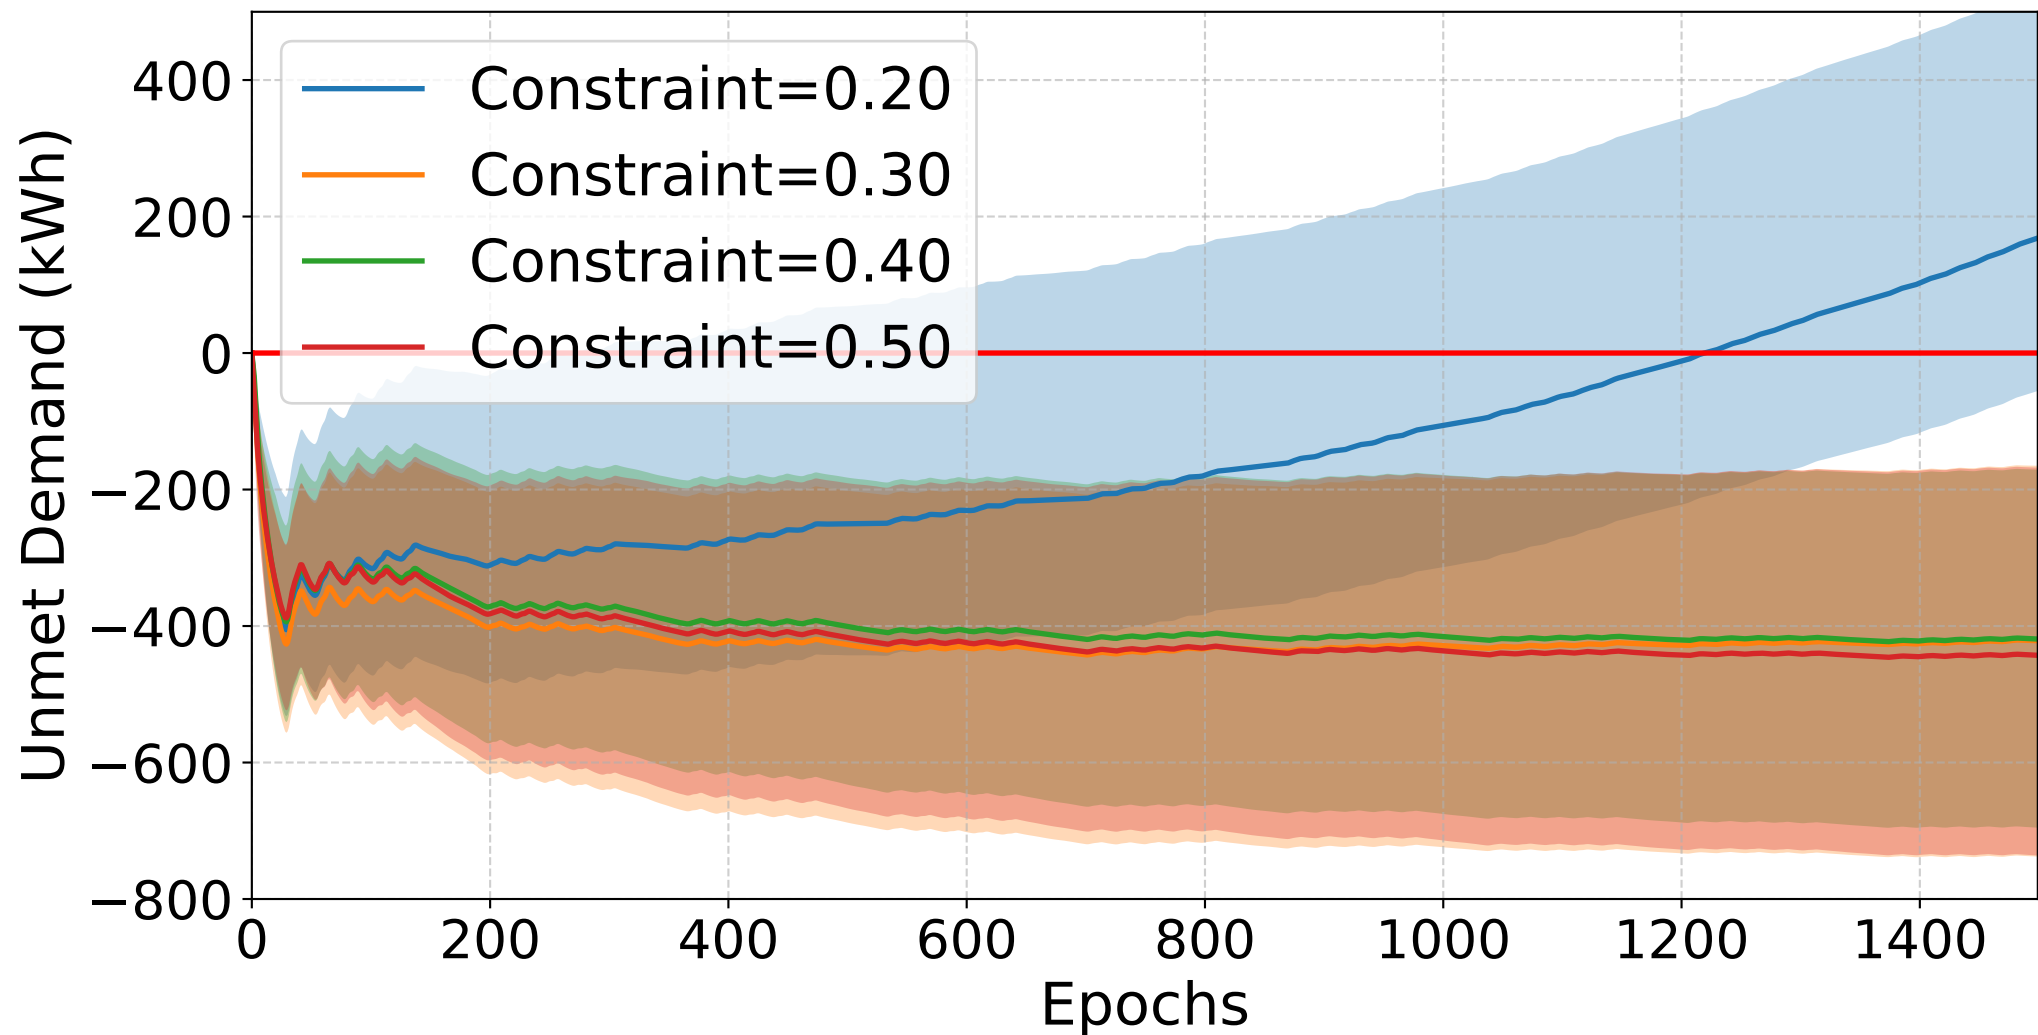

Supplement: supplementary_material [file unmet_demand_with_consensus.pdf › iclear_code_base/cmarl_algorithm/results/unmet_demand_with_consensus.pdf]

# Unmet Demand without Consensus

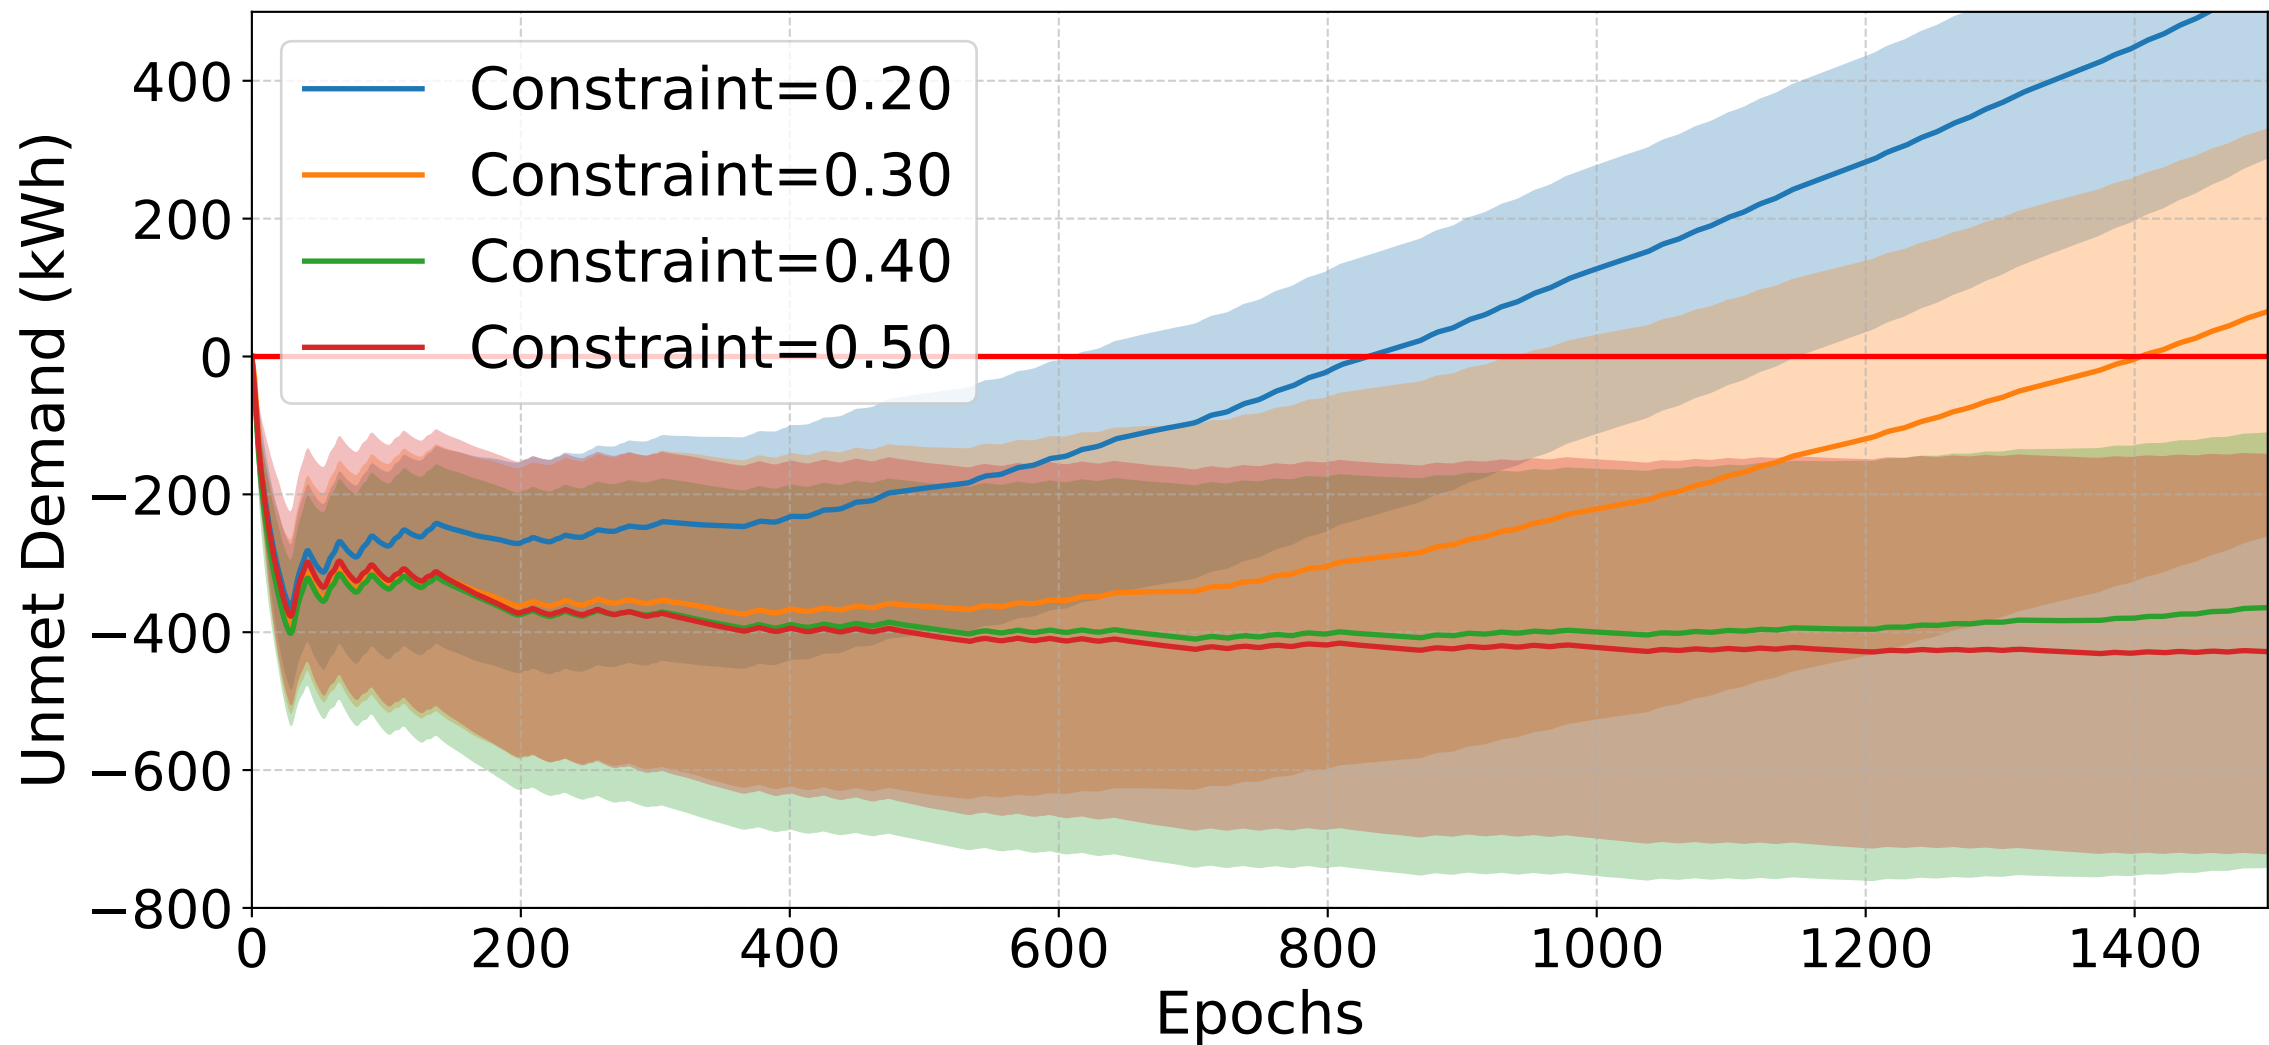

Supplement: supplementary_material [file unmet_demand_without_consensus.pdf › iclear_code_base/cmarl_algorithm/results/unmet_demand_without_consensus.pdf]

Grid consumption (kW)

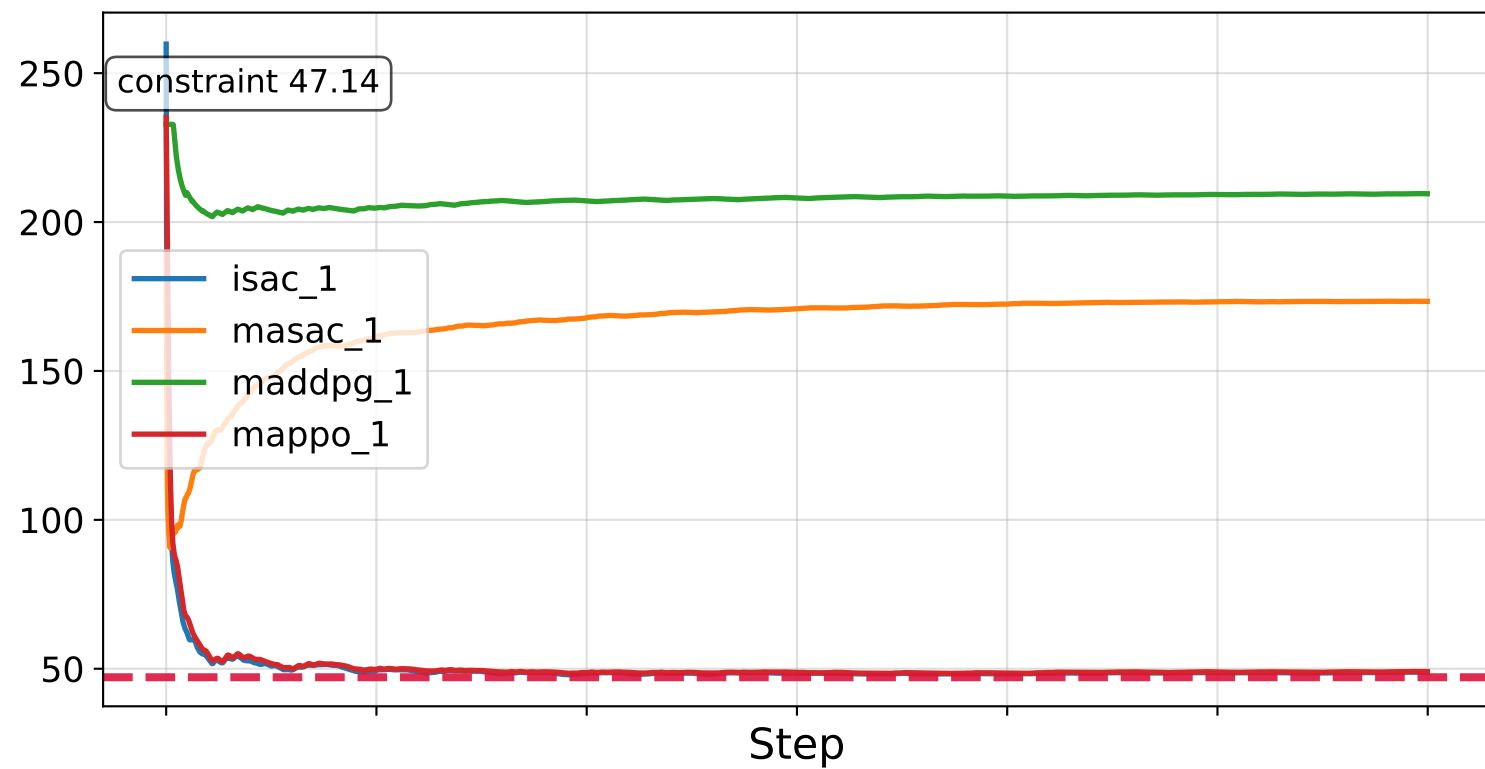

Battery consumption (kW)

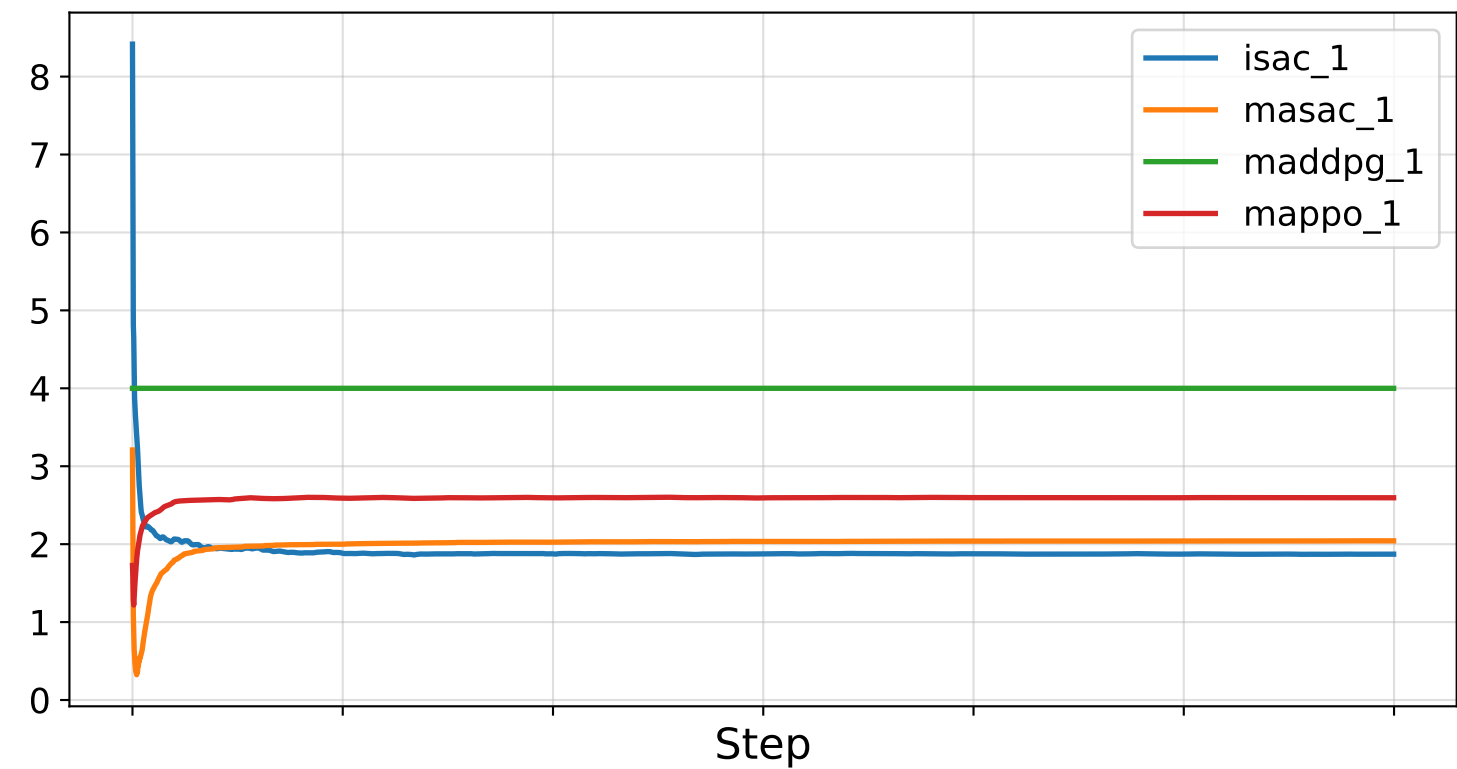

Postponed demand (kWh)

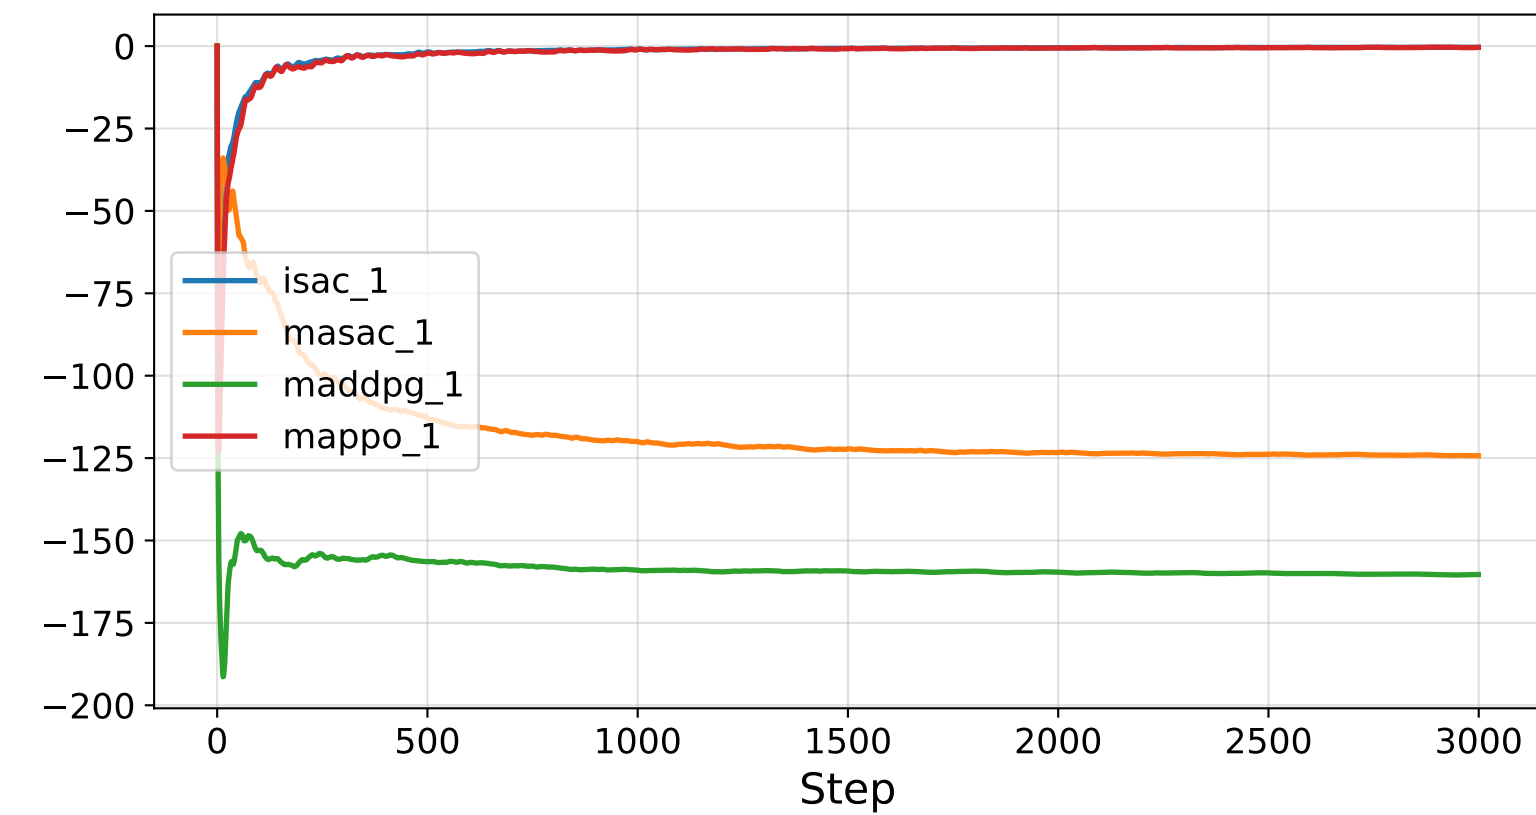

Cost (\$/step)

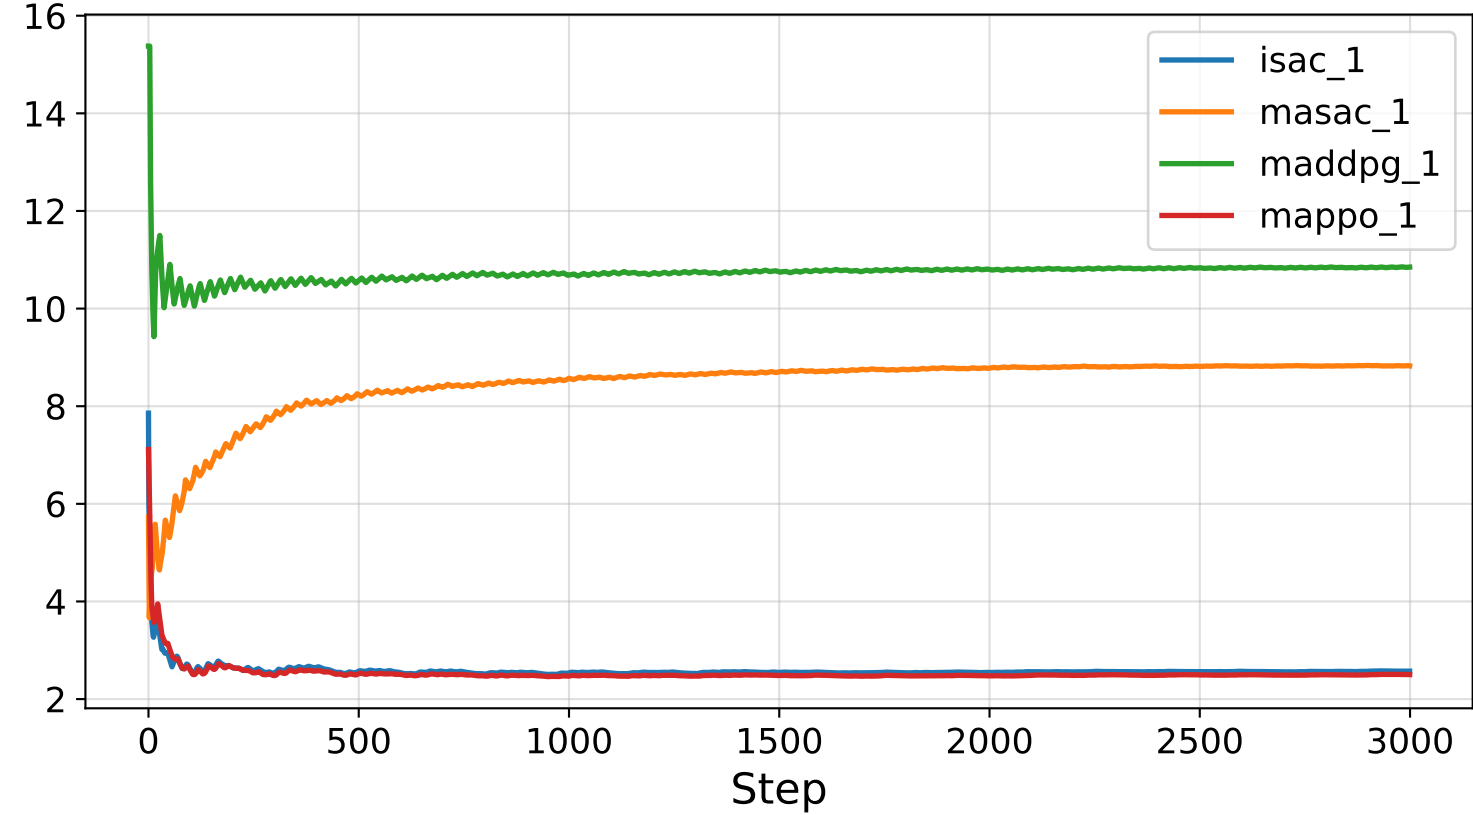

Supplement: supplementary_material [file marl_benchmarks.pdf › iclear_code_base/marlBenchmarks/marl_benchmarks.pdf]
